# Supplementary material for: A General Theory of Pass-Through in Channels with Category Management and Retail Competition
Source: Atypon-hosted journal article supplement (doi:10.1287/mksc.1030.0053), 2005-02-01
Supplement: mksc.1030.0053-sm-technical-appendix.pdf [file mksc.1030.0053-sm-technical-appendix.pdf]

Appendix for "A General Theory of  
Pass-Through in Channels with Category  
Management and Retail Competition"

Sridhar Moorthy  
University of Toronto

December 12, 2003

## Proof of Lemma 2

I will show that  $[-H^{-1}]_{11} \geq [-H^{-1}]_{12}$ ; the others follow similarly.

By definition of an inverse,

$$[-H^{-1}]_{11} = - \begin{vmatrix} \pi_{1212}^1 & \pi_{1221}^1 & \pi_{1222}^1 \\ \pi_{2112}^2 & \pi_{2121}^2 & \pi_{2122}^2 \\ \pi_{2212}^2 & \pi_{2221}^2 & \pi_{2222}^2 \end{vmatrix} \quad \text{and} \quad [-H^{-1}]_{12} = \begin{vmatrix} \pi_{1112}^1 & \pi_{1121}^1 & \pi_{1122}^1 \\ \pi_{2112}^2 & \pi_{2121}^2 & \pi_{2122}^2 \\ \pi_{2212}^2 & \pi_{2221}^2 & \pi_{2222}^2 \end{vmatrix}.$$

Therefore,  $[-H^{-1}]_{11} - [-H^{-1}]_{12}$

$$\begin{aligned} &= (-\pi_{1212}^1 - \pi_{1112}^1)[\pi_{2121}^2\pi_{2222}^2 - (\pi_{2122}^2)^2] + (\pi_{1221}^1 + \pi_{1121}^1)[\pi_{2112}^2\pi_{2222}^2 - \pi_{2212}^2\pi_{2122}^2] + \\ &(-\pi_{1222}^1 - \pi_{1122}^1)[\pi_{2112}^2\pi_{2221}^2 - \pi_{2212}^2\pi_{2121}^2], \\ &= (-\pi_{1212}^1 - \pi_{1112}^1)[\pi_{2121}^2\pi_{2222}^2 - (\pi_{2122}^2)^2] - (\pi_{1221}^1 + \pi_{1121}^1)[-\pi_{2112}^2\pi_{2222}^2 + \pi_{2212}^2\pi_{2122}^2] - \\ &(\pi_{1222}^1 + \pi_{1122}^1)[-\pi_{2121}^2\pi_{2221}^2 + \pi_{2112}^2\pi_{2221}^2], \\ &> (-\pi_{1212}^1 - \pi_{1112}^1)[\pi_{2121}^2\pi_{2222}^2 - (\pi_{2122}^2)^2] - (\pi_{2121}^2 - \pi_{2221}^2)[-\pi_{2112}^2\pi_{2222}^2 + \pi_{2212}^2\pi_{2122}^2] - \\ &(-\pi_{2222}^2 - \pi_{2122}^2)[-\pi_{2121}^2\pi_{2221}^2 + \pi_{2112}^2\pi_{2221}^2], \quad (\text{using Assumption 2 (e)}) \\ &= [\pi_{2121}^2\pi_{2222}^2 - (\pi_{2122}^2)^2](-\pi_{1212}^1 - \pi_{1112}^1 - \pi_{2112}^2 - \pi_{2212}^2) \\ &> 0 \quad (\text{using Assumption 2 (e)}). \end{aligned}$$

## Proof of Lemma 3

I will show that if  $|\pi_{2222}^2| \geq |\pi_{2121}^2|$ ,  $\pi_{1221}^1 \geq \pi_{1122}^1$  and  $\pi_{1121}^1 \geq \pi_{1222}^1$ , then  $[-H^{-1}]_{13} \geq [-H^{-1}]_{14}$ ; the others follow similarly.

$$H \equiv \begin{bmatrix} \pi_{1111}^1 & \pi_{1112}^1 & \pi_{1121}^1 & \pi_{1122}^1 \\ \pi_{1211}^1 & \pi_{1212}^1 & \pi_{1221}^1 & \pi_{1222}^1 \\ \pi_{2111}^2 & \pi_{2112}^2 & \pi_{2121}^2 & \pi_{2122}^2 \\ \pi_{2211}^2 & \pi_{2212}^2 & \pi_{2221}^2 & \pi_{2222}^2 \end{bmatrix}$$

$$[-H^{-1}]_{14} = \begin{vmatrix} \pi_{1112}^1 & \pi_{1121}^1 & \pi_{1122}^1 \\ \pi_{1212}^1 & \pi_{1221}^1 & \pi_{1222}^1 \\ \pi_{2112}^2 & \pi_{2121}^2 & \pi_{2122}^2 \end{vmatrix} \quad \text{and} \quad [-H^{-1}]_{13} = - \begin{vmatrix} \pi_{1112}^1 & \pi_{1121}^1 & \pi_{1122}^1 \\ \pi_{1212}^1 & \pi_{1221}^1 & \pi_{1222}^1 \\ \pi_{2212}^2 & \pi_{2221}^2 & \pi_{2222}^2 \end{vmatrix}.$$

Therefore,  $[-H^{-1}]_{13} - [-H^{-1}]_{14}$

$$\begin{aligned}
&= -(\pi_{2112}^2 + \pi_{2212}^2)(\pi_{1121}^1 \pi_{1222}^1 - \pi_{1221}^1 \pi_{1122}^1) - [(-\pi_{2121}^2 - \pi_{2221}^2)(\pi_{1112}^1 \pi_{1222}^1 - \pi_{1212}^1 \pi_{1122}^1)] + [(-\pi_{2222}^2 - \pi_{2122}^2)(\pi_{1112}^1 \pi_{1221}^1 - \pi_{1212}^1 \pi_{1121}^1)], \\
&\geq -(\pi_{2112}^2 + \pi_{2212}^2)(\pi_{1121}^1 \pi_{1121}^1 - \pi_{1122}^1 \pi_{1122}^1) - [(-\pi_{2121}^2 - \pi_{2221}^2)(\pi_{1112}^1 \pi_{1121}^1 - \pi_{1212}^1 \pi_{1122}^1)] + [(-\pi_{2121}^2 - \pi_{2122}^2)(\pi_{1112}^1 \pi_{1122}^1 - \pi_{1212}^1 \pi_{1121}^1)], \\
&= -(\pi_{2112}^2 + \pi_{2212}^2)(\pi_{1121}^1 - \pi_{1122}^1)(\pi_{1121}^1 + \pi_{1122}^1) + (-\pi_{2121}^2 - \pi_{2221}^2)[\pi_{1121}^1(-\pi_{1212}^1 - \pi_{1112}^1) - \pi_{1122}^1(-\pi_{1212}^1 - \pi_{1112}^1)], \\
&= -(\pi_{2112}^2 + \pi_{2212}^2)(\pi_{1121}^1 - \pi_{1122}^1)(\pi_{1121}^1 + \pi_{1122}^1) + (-\pi_{2121}^2 - \pi_{2221}^2)(-\pi_{1212}^1 - \pi_{1112}^1)(\pi_{1121}^1 - \pi_{1122}^1), \\
&= (\pi_{1121}^1 - \pi_{1122}^1)[(-\pi_{2121}^2 - \pi_{2221}^2)(-\pi_{1212}^1 - \pi_{1112}^1) - (\pi_{1121}^1 + \pi_{1122}^1)(\pi_{2112}^2 + \pi_{2212}^2)], \\
&> 0,
\end{aligned}$$

because  $\pi_{1121}^1 > \pi_{1122}^1$ ,  $(-\pi_{2121}^2 - \pi_{2221}^2) > (\pi_{1121}^1 + \pi_{1122}^1) \geq (\pi_{1121}^1 + \pi_{1122}^1)$ , and  $(-\pi_{1212}^1 - \pi_{1112}^1) > (\pi_{2112}^2 + \pi_{2212}^2)$ .
